# Supplementary material
Source: publisher figshare collection journal article supplement (https://sage.figshare.com/ndownloader/files/23063471)

Fig. S1: Cluster analysis based on square-root transformed percentages of non-rare chironomid head taxa.

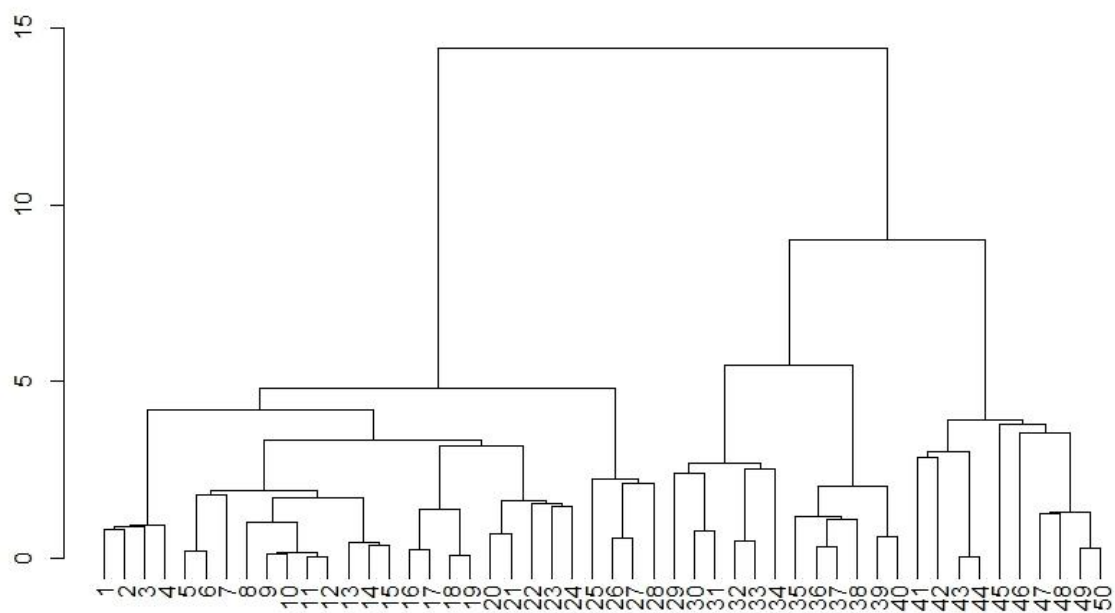

Fig. S2: Broken-stick analysis based on square-root transformed percentages of non-rare chironomid taxa.

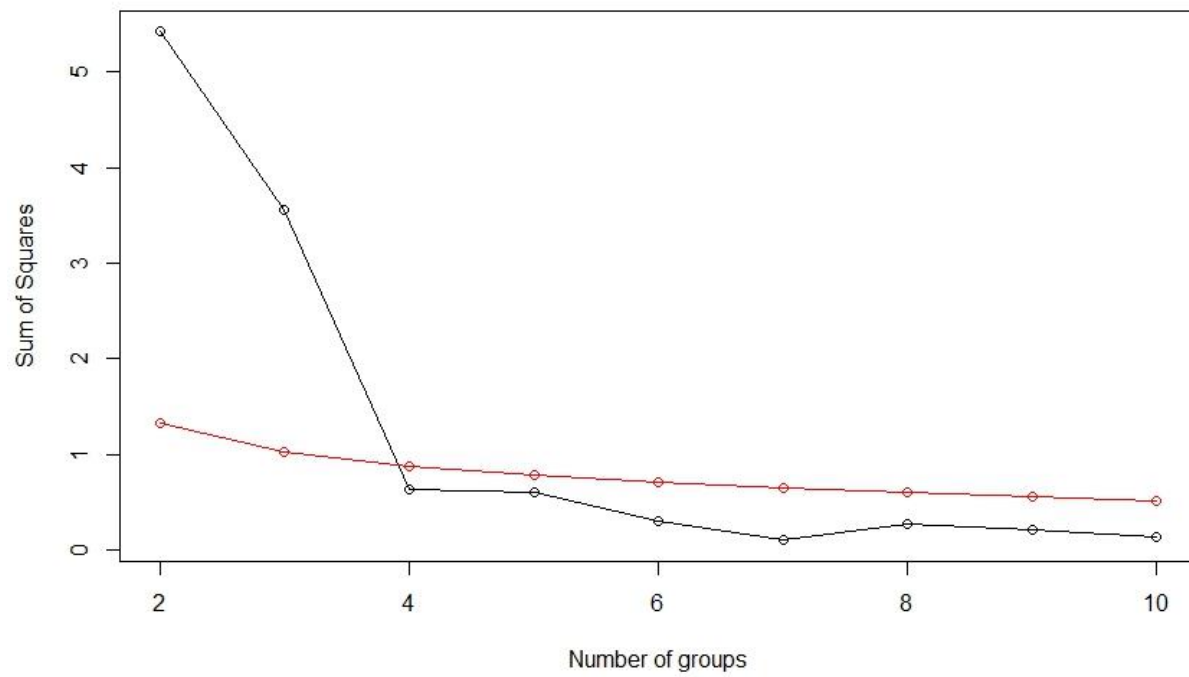

Supplement: Supplementary file 1 [file 23063471]
